# Supplementary material for: Enhancement of spin polarization induced by Coulomb on-site repulsion between localized pz electrons in graphene embedded with line defects
Source: Royal Society of Chemistry journal article supplement (doi:10.1039/c5cp03764f), 2015-01-01
Supplement: c5cp03764f1.pdf [file c5cp03764f1.pdf]

## Supplemental Material

To extend our work to other system containing localized  $p$  electrons, we studied the magnetism of graphene with single vacancy based on the DFT+ $U$  method.

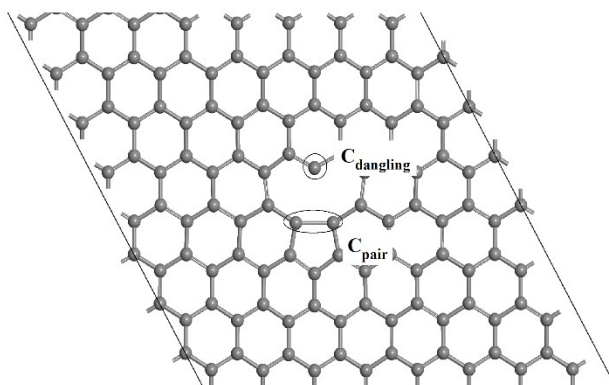

Figure S1 Optimized geometric structure of graphene with single vacancy. The carbons nearby the vacancy are denoted as  $C_{\text{pair}}$  and  $C_{\text{dangling}}$ , respectively.

The optimized geometric structure is obtained based on DFT with PBE type of GGA functionals, as shown in Figure S1. As discussed in Ref. 1, nearby the vacancy, there is one dangling bond ( $C_{\text{dangling}}$ ) and two localized  $p_z$  electrons which form a localized  $\pi$  bond ( $C_{\text{pair}}$ ). Both contribute strongly to the magnetism of the system.

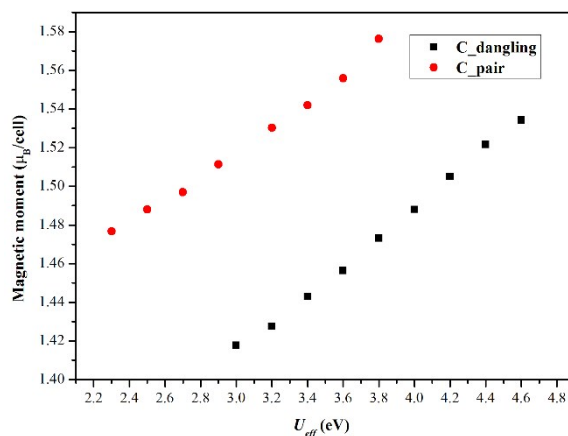

Figure S2 Magnetic moment of the system as a function of  $U_{\text{eff}}$  at sites  $C_{\text{dangling}}$  and  $C_{\text{pair}}$ , respectively.

To study the  $U$ -dependent magnetism of the system, we calculated the magnetic moment of the system using the DFT+ $U$  method with a series of values of  $U_{\text{eff}}$  on the sites  $C_{\text{dangling}}$  and  $C_{\text{pair}}$ , respectively. As shown in Figure 2S, the magnetic moment increases almost linearly with the increasing of  $U_{\text{eff}}$  at the  $C_{\text{dangling}}$  site and the  $C_{\text{pair}}$  site, indicating that Coulomb on-site repulsion cannot be ignored between localized  $p$  electrons in this system.

To estimate the contribution of the localized density of states (DOS) in this system, we calculated the PDOS of  $p_z$  electrons of carbon atoms at GNR and ELD. As shown in Figure S3, most of the localized DOS near the Fermi level is contributed by the carbon atoms at edge-A and  $C_2$  sites.

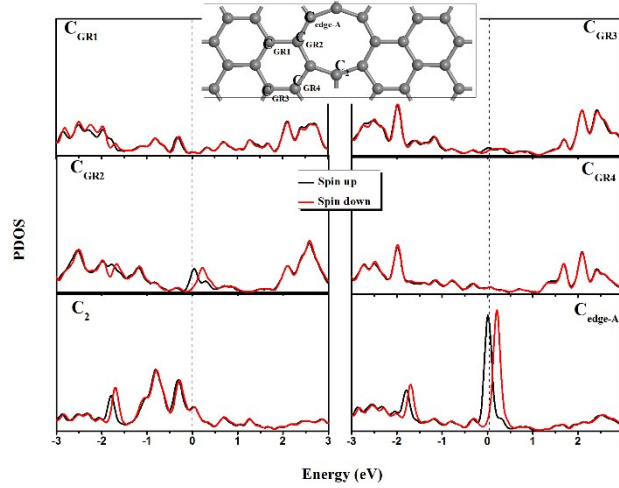

Figure S3 PDOS of  $p_z$  electrons of carbon atoms at different sites.  $C_{GR1-4}$  are carbon atoms at the GNR;  $C_2$  and  $C_{edge-A}$  are carbon atoms at the center and edges of the ELD, respectively, as shown in the insert. The Fermi energy is set to be zero.

## Reference

- [1] O. V. Yazyev and L. Helm, *Phys. Rev. B*, **75**, 125408 (2007).
